# Supplementary material for: Network Analysis of Neuropsychiatric Symptoms in Alzheimer’s Disease
Source: PubMed Central journal article supplement (PMC10168435; doi:10.21203/rs.3.rs-2852697/v1), 2023-04-28
Supplement: NIHPPrs2852697v1-supplement-1.pdf [file NIHPPrs2852697v1-supplement-1.pdf]

## Supplementary Files

This is a list of supplementary files associated with this preprint. Click to download.

- [SupplementaryMaterialNetworkNPIQ.docx](#)
